# Supplementary material
Source: Springer Nature journal article supplement (https://www.springermedizin.de/resource/supplementary/13058_2014_3424_MOESM1_ESM.pdf/9704150)
Supplement: MOESM1 [file 9704150]

File name: **Additional file 1**

Title: **Supplementary Methods**

## RNA preparation and quantitative PCR

| The following primer sequences (5' to 3') were used: |                        |
|------------------------------------------------------|------------------------|
| Gene                                                 | Sequence               |
| h <i>TGFBR3</i> forward                              | TGGGGTCTCCAGACTGTTTTT  |
| h <i>TGFBR3</i> reverse                              | CTGCTCCATACTCTTTTCGGG  |
| h <i>PAI-1</i> forward                               | GACATCCTGGAAGTCCCTA    |
| h <i>PAI-1</i> reverse                               | GGTCATGTTGCCTTTCCAAGT  |
| h <i>SMAD7</i> forward                               | CCAACTGCAGACTGTCCAGA   |
| h <i>SMAD7</i> reverse                               | CAGGCTCCAGAAGAAGTTGG   |
| h <i>ITGA2</i> forward                               | CCTACAATGTTGGTCTCCCAGA |
| h <i>ITGA2</i> reverse                               | AGTAACCAGTTGCCTTTTGATT |

## Immunoblotting

| ANTIBODY<br>(in alphabetical order) | COMPANY        | CATALOG #  | SPECIES | Concentrations |
|-------------------------------------|----------------|------------|---------|----------------|
| cleaved Caspase-3                   | Cell Signaling | 9661       | rabbit  | 1:1000         |
| ERK                                 | Cell Signaling | 9107       | mouse   | 1:2000         |
| ERK, phospho                        | Cell Signaling | 4370       | rabbit  | 1:2000         |
| PARP                                | Cell Signaling | 9542       | rabbit  | 1:1000         |
| Smad2                               | Cell Signaling | 5339       | rabbit  | 1:1000         |
| Smad2, phospho                      | Cell Signaling | 3101       | rabbit  | 1:1000         |
| TβRII                               | Santa Cruz     | SC400      | rabbit  | 1:4000         |
| TβRIII                              | SDIX           | 2703.00.02 | rabbit  | 1:10000        |

## Microarray Gene Expression GEO registration numbers

Breast Cancer GE data sets used to derive TNBC training and validation sets:

GSE-3494 , GSE-7904 , GSE-2109 , GSE-7390 , E-TABM-158 , GSE-2034 , GSE-2990 , GSE-1456 , GSE-22513 , GSE-28821, GSE-28796 , GSE-11121 , GSE-2603 , MDA133 , GSE-5364 , GSE-1561 , GSE-5327 , GSE-5847 , GSE-12276 , GSE-16446 , GSE-18864 , GSE-19615 , GSE-20194. (*Lehmann BD, Bauer JA, Chen X, Sanders ME, Chakravarthy AB, Shyr Y, PiTENpol JA: Identification of human triple-negative breast cancer subtypes and preclinical models for selection of targeted therapies. The Journal of clinical investigation 2011, 121(7):2750-2767.*)
